# Supplementary material for: The Effect of Plant Growth Compensation by Adding Silicon-Containing Fertilizer under Light Stress Conditions
Source: MDPI journal article supplement (doi:10.3390/plants10071287), 2021-06-24
Supplement: s1 [file s1]

## Supplementary Materials

**Table S1.** LCD values for biometric parameters of the aerial part of green and red lettuce (*Lactuca sativa* L.) under conditions of a regulated agroecosystem on the 15 th day of cultivation.

| Lighting<br>(A) | Si (B)                 | Lettuce<br>(C) | Plant mass, g |      | Number of<br>leaves | Length of a<br>leaf, cm | Moisture, % | Leaf area, cm <sup>2</sup> |
|-----------------|------------------------|----------------|---------------|------|---------------------|-------------------------|-------------|----------------------------|
|                 |                        |                | Fresh         | dry  |                     |                         |             |                            |
|                 | LSD ( $p < 0.05$ ) A   |                | 0.26          | 0.05 | 0.21                | 0.5                     | -           | 21.61                      |
|                 | LSD ( $p < 0.05$ ) B   |                | 0.26          | 0.05 | 0.21                | 0.5                     | -           | 21.61                      |
|                 | LSD ( $p < 0.05$ ) C   |                | -             | -    | 0.21                | 0.5                     | -           | -                          |
|                 | LSD ( $p < 0.05$ ) AB  |                | -             | -    | -                   | -                       | -           | 40.75                      |
|                 | LSD ( $p < 0.05$ ) AC  |                | -             | -    | -                   | -                       | 0.65        | -                          |
|                 | LSD ( $p < 0.05$ ) BC  |                | -             | -    | -                   | 0.93                    | -           | -                          |
|                 | LSD ( $p < 0.05$ ) ABC |                | -             | -    | -                   | -                       | -           | -                          |

**Table S2.** LCD values for concentrations of photosynthetic pigments in green and red lettuce (*Lactuca sativa* L.) under conditions of a regulated agroecosystem on the 15 th day of cultivation.

| Lighting (A) | Si (B)                 | Lettuce (C) | Chlorophyll a, mg/g | Chlorophyll b, mg/g | Carotenoids, mg/g |
|--------------|------------------------|-------------|---------------------|---------------------|-------------------|
|              | LSD ( $p < 0.05$ ) A   |             | -                   | -                   | -                 |
|              | LSD ( $p < 0.05$ ) B   |             | 0.15                | 0.06                | 0.06              |
|              | LSD ( $p < 0.05$ ) C   |             | 0.15                | 0.06                | 0.06              |
|              | LSD ( $p < 0.05$ ) AB  |             | 0.29                | 0.11                | 0.12              |
|              | LSD ( $p < 0.05$ ) AC  |             | 0.29                | 0.11                | 0.12              |
|              | LSD ( $p < 0.05$ ) BC  |             | 0.29                | -                   | -                 |
|              | LSD ( $p < 0.05$ ) ABC |             | 0.56                | 0.20                | 0.23              |

**Table S3.** LCD values for biometric parameters of the aerial part of green and red lettuce (*Lactuca sativa* L.) under the conditions of a regulated agroecosystem on the 30 th day of cultivation.

| Lighting<br>(A) | Si (B)                 | Lettuce<br>(C) | Plant mass, g |     | Number of<br>leaves | Length of a<br>leaf, cm | Moisture, % | Leaf area,<br>cm <sup>2</sup> | Photo productiv-<br>ity, g/m <sup>2</sup> per day |
|-----------------|------------------------|----------------|---------------|-----|---------------------|-------------------------|-------------|-------------------------------|---------------------------------------------------|
|                 |                        |                | Fresh         | Dry |                     |                         |             |                               |                                                   |
|                 | LSD ( $p < 0.05$ ) A   |                | -             | -   | -                   | -                       | -           | -                             | -                                                 |
|                 | LSD ( $p < 0.05$ ) B   |                | -             | -   | -                   | -                       | -           | -                             | -                                                 |
|                 | LSD ( $p < 0.05$ ) C   |                | -             | -   | 0.81                | -                       | -           | -                             | -                                                 |
|                 | LSD ( $p < 0.05$ ) AB  |                | 9.28          | -   | 1.51                | -                       | -           | -                             | 0.7                                               |
|                 | LSD ( $p < 0.05$ ) AC  |                | -             | -   | -                   | -                       | -           | -                             | -                                                 |
|                 | LSD ( $p < 0.05$ ) BC  |                | -             | -   | -                   | -                       | -           | -                             | -                                                 |
|                 | LSD ( $p < 0.05$ ) ABC |                | -             | -   | -                   | -                       | -           | -                             | -                                                 |

**Table S4.** LCD values for concentrations of sucrose, vitamin C, and nitrates in green and red lettuce (*Lactuca sativa* L.) under the conditions of a regulated agroecosystem on the 30 th day of cultivation.

| Lighting<br>(A) | Si (B)                 | Lettuce<br>(C) | Vitamin C,<br>mg/100 g | Nitrate,<br>mg/kg | Chlorophyll a,<br>mg/g | Chlorophyll b,<br>mg/g | Carotenoids, mg/g |
|-----------------|------------------------|----------------|------------------------|-------------------|------------------------|------------------------|-------------------|
|                 | LSD ( $p < 0.05$ ) A   |                | -                      | -                 | -                      | -                      | -                 |
|                 | LSD ( $p < 0.05$ ) B   |                | -                      | -                 | -                      | -                      | -                 |
|                 | LSD ( $p < 0.05$ ) C   |                | -                      | -                 | -                      | -                      | -                 |
|                 | LSD ( $p < 0.05$ ) AB  |                | -                      | 0.67              | -                      | -                      | -                 |
|                 | LSD ( $p < 0.05$ ) AC  |                | -                      | -                 | -                      | -                      | -                 |
|                 | LSD ( $p < 0.05$ ) BC  |                | -                      | -                 | -                      | -                      | -                 |
|                 | LSD ( $p < 0.05$ ) ABC |                | -                      | 1.28              | -                      | -                      | -                 |

**Table S5.** LCD values for biometric parameters of the aerial part of green and red lettuce (*Lactuca sativa* L.) under the conditions of a regulated agroecosystem on the 45 th day of cultivation.

| Lighting<br>(A) | Si (B)                 | Lettuce<br>(C) | Plant mass, g |     | Number of<br>leaves | Length of a<br>leaf, cm | Moisture, % | Leaf area,<br>cm <sup>2</sup> | Photo productiv-<br>ity, g/m <sup>2</sup> per day |
|-----------------|------------------------|----------------|---------------|-----|---------------------|-------------------------|-------------|-------------------------------|---------------------------------------------------|
|                 |                        |                | Fresh         | Dry |                     |                         |             |                               |                                                   |
|                 | LSD ( $p < 0.05$ ) A   |                | 8.64          | -   | 1.26                | 1.41                    | 0.11        | 638.53                        | -                                                 |
|                 | LSD ( $p < 0.05$ ) B   |                | -             | -   | -                   | 1.41                    | -           | -                             | -                                                 |
|                 | LSD ( $p < 0.05$ ) C   |                | 8.64          | -   | 1.26                | -                       | 0.11        | -                             | -                                                 |
|                 | LSD ( $p < 0.05$ ) AB  |                | -             | -   | -                   | -                       | 0.21        | -                             | -                                                 |
|                 | LSD ( $p < 0.05$ ) AC  |                | -             | -   | -                   | 2.64                    | 0.21        | -                             | -                                                 |
|                 | LSD ( $p < 0.05$ ) BC  |                | -             | -   | -                   | -                       | -           | -                             | -                                                 |
|                 | LSD ( $p < 0.05$ ) ABC |                | -             | -   | -                   | -                       | -           | -                             | -                                                 |

**Table S6.** LCD values for concentrations of chlorophyll *a* and *b*, carotenoids, and nitrates in green and red lettuce (*Lactuca sativa* L.) under the conditions of a regulated agroecosystem on the 45 th day of cultivation.

| Lighting<br>(A) | Si (B)                 | Lettuce (C) | Nitrate, mg/kg | Chlorophyll <i>a</i> , mg/g | Chlorophyll <i>b</i> , mg/g | Carotenoids, mg/g |
|-----------------|------------------------|-------------|----------------|-----------------------------|-----------------------------|-------------------|
|                 | LSD ( $p < 0.05$ ) A   |             | 0.26           | -                           | -                           | 0.06              |
|                 | LSD ( $p < 0.05$ ) B   |             | -              | 0.21                        | -                           | -                 |
|                 | LSD ( $p < 0.05$ ) C   |             | -              | -                           | 0.11                        | 0.06              |
|                 | LSD ( $p < 0.05$ ) AB  |             | 0.50           | -                           | 0.21                        | -                 |
|                 | LSD ( $p < 0.05$ ) AC  |             | -              | -                           | 0.21                        | -                 |
|                 | LSD ( $p < 0.05$ ) BC  |             | -              | -                           | 0.21                        | 0.11              |
|                 | LSD ( $p < 0.05$ ) ABC |             | 0.95           | -                           | -                           | 0.22              |
